# Supplementary material
Source: PubMed Central journal article supplement (PMC6171284)
Supplement: ASN.2017111204SupplementaryData1.pdf [file ASN.2017111204SupplementaryData1.pdf]

**Supplementary Table 1: Adjusted analysis of transplantation in VA patients compared to other insurance groups nationally in a competing risks model with death as a competing risk.**

|                        | <b>All Transplants</b>   | <b>Deceased Donor Transplant</b> | <b>Living Donor Transplant</b> |
|------------------------|--------------------------|----------------------------------|--------------------------------|
| <b>VA vs. Private</b>  | <b>0.75 (0.71, 0.79)</b> | <b>0.88 (0.83, 0.94)</b>         | <b>0.53 (0.47, 0.59)</b>       |
| <b>VA vs. Medicare</b> | <b>0.90 (0.85, 0.94)</b> | 0.96 (0.90, 1.02)                | <b>0.80 (0.72, 0.89)</b>       |
| <b>VA vs. Medicaid</b> | 1.05 (1.00, 1.11)        | <b>1.08 (1.01, 1.15)</b>         | 1.04 (0.93, 1.16)              |

Models adjusted for age group, race, gender, diagnosis group, time on dialysis at listing, candidate status at listing, PRA, BMI group, education, malignancy, peripheral vascular disease, region, year of listing, log distance to center and community risk score.

Model of deceased donor transplant excludes live donor transplants. Model of living donor transplant excludes deceased donor transplants.

**Supplementary Table 2a: Adjusted Cox analysis of transplantation, mortality and delisting in VA patients compared to other insurance groups nationally excluding those with missing education data.**

|                        | All Transplants          | Deceased Donor Transplant | Living Donor Transplant  | Death                    | Delisting*               |
|------------------------|--------------------------|---------------------------|--------------------------|--------------------------|--------------------------|
| <b>VA vs. Private</b>  | <b>0.74 (0.70, 0.79)</b> | <b>0.85 (0.79, 0.91)</b>  | <b>0.56 (0.49, 0.63)</b> | 0.93 (0.84, 1.03)        | <b>1.57 (1.40, 1.75)</b> |
| <b>VA vs. Medicare</b> | <b>0.89 (0.83, 0.94)</b> | <b>0.91 (0.84, 0.97)</b>  | <b>0.85 (0.75, 0.97)</b> | <b>0.81 (0.73, 0.90)</b> | <b>1.23 (1.10, 1.37)</b> |
| <b>VA vs. Medicaid</b> | 1.03 (0.97, 1.10)        | 1.01 (0.94, 1.09)         | 1.08 (0.95, 1.24)        | <b>0.80 (0.72, 0.89)</b> | <b>1.18 (1.05, 1.33)</b> |

**Supplementary Table 2b: Adjusted Cox analysis of transplantation, mortality and delisting in VA patients compared to other insurance groups nationally censoring data on December 4, 2014.**

|                        | All Transplants          | Deceased Donor Transplant | Living Donor Transplant  | Death                    | Delisting*               |
|------------------------|--------------------------|---------------------------|--------------------------|--------------------------|--------------------------|
| <b>VA vs. Private</b>  | <b>0.74 (0.70, 0.79)</b> | <b>0.86 (0.80, 0.92)</b>  | <b>0.56 (0.50, 0.63)</b> | <b>0.86 (0.78, 0.96)</b> | <b>1.42 (1.27, 1.59)</b> |
| <b>VA vs. Medicare</b> | <b>0.88 (0.83, 0.94)</b> | <b>0.92 (0.86, 0.99)</b>  | <b>0.85 (0.75, 0.95)</b> | <b>0.74 (0.67, 0.82)</b> | 1.11 (0.99, 1.24)        |
| <b>VA vs. Medicaid</b> | 1.03 (0.97, 1.10)        | 1.02 (0.95, 1.10)         | 1.09 (0.96, 1.23)        | <b>0.72 (0.65, 0.80)</b> | 1.06 (0.94, 1.19)        |

Models adjusted for age group, race, gender, diagnosis group, time on dialysis at listing, candidate status at listing, PRA, BMI group, education, malignancy, peripheral vascular disease, region, year of listing, log distance to center and community risk score.

Model of deceased donor transplant excludes live donor transplants. Model of living donor transplant excludes deceased donor transplants.

\*Delisting for reasons of “health deterioration” or “other”

**Supplementary Table 3: Interaction between log distance to transplant center and insurance. Adjusted Cox analysis of transplantation and mortality.**

|                                                 | <b>All Transplants</b>    | <b>Deceased Donor Transplant</b> | <b>Living Donor Transplant</b> | <b>Death</b>             |
|-------------------------------------------------|---------------------------|----------------------------------|--------------------------------|--------------------------|
| <b>Private per 1 log unit distance greater</b>  | <b>1.02 (1.01, 1.02)</b>  | 0.99 (0.98, 1.00)                | <b>1.04 (1.03, 1.05)</b>       | <b>1.04 (1.03, 1.05)</b> |
| <b>Medicare per 1 log unit distance greater</b> | <b>0.99 (0.98, 0.997)</b> | <b>0.97 (0.96, 0.98)</b>         | <b>1.06 (1.04, 1.07)</b>       | <b>1.02 (1.01, 1.03)</b> |
| <b>Medicaid per 1 log unit distance greater</b> | 0.99 (0.97, 1.00)         | <b>0.98 (0.96, 0.99)</b>         | 1.0 (0.97, 1.03)               | <b>1.08 (1.05, 1.10)</b> |
| <b>VA per 1 log unit distance greater</b>       | 0.99 (0.95, 1.03)         | 0.99 (0.95, 1.03)                | 0.97 (0.90, 1.04)              | 0.98 (0.93, 1.04)        |

Models include age group, race, gender, diagnosis group, time on dialysis at listing, candidate status at listing, PRA, BMI group, education, malignancy, peripheral vascular disease, region, year of listing, community risk score, insurance and interaction between log distance and insurance.

Model of deceased donor transplant excludes live donor transplants. Model of living donor transplant excludes deceased donor transplants.

**Supplementary Table 4. Demographic variables for patients in the VA plus four matched centers vs. all others.**

| <b>Factor</b>               | <b>Overall (n=302457)</b> | <b>Others (n=292692)</b> | <b>Four VA centers+ matched (n=9765)</b> | <b>p-value</b>      |
|-----------------------------|---------------------------|--------------------------|------------------------------------------|---------------------|
| Age                         | 52.4±12.9                 | 52.3±12.9                | 54.7±12.5                                | <0.001 <sup>a</sup> |
| Male gender                 | 185296(61.3)              | 178327(60.9)             | 6969(71.4)                               | <0.001 <sup>c</sup> |
| Race/ethnicity              |                           |                          |                                          | <0.001 <sup>c</sup> |
| White                       | 136195(45.0)              | 129649(44.3)             | 6546(67.0)                               |                     |
| Black                       | 87725(29.0)               | 85240(29.1)              | 2485(25.4)                               |                     |
| Hispanic                    | 52697(17.4)               | 52305(17.9)              | 392(4.0)                                 |                     |
| Other                       | 25840(8.5)                | 25498(8.7)               | 342(3.5)                                 |                     |
| Diagnosis of ESRD           |                           |                          |                                          | <0.001 <sup>c</sup> |
| Diabetes                    | 107293(35.5)              | 103821(35.5)             | 3472(35.6)                               |                     |
| Hypertension                | 65636(21.7)               | 63982(21.9)              | 1654(16.9)                               |                     |
| Glomerulonephritis          | 51213(16.9)               | 49513(16.9)              | 1700(17.4)                               |                     |
| Polycystic                  | 22481(7.4)                | 21614(7.4)               | 867(8.9)                                 |                     |
| Other                       | 55834(18.5)               | 53762(18.4)              | 2072(21.2)                               |                     |
| Peripheral Vascular Disease | 17824(5.9)                | 17456(6.0)               | 368(3.8)                                 | <0.001 <sup>c</sup> |
| Malignancy                  | 18389(6.1)                | 17542(6.0)               | 847(8.7)                                 | <0.001 <sup>c</sup> |
| Total Serum Albumin         | 3.9±0.61                  | 3.9±0.61                 | 3.9±0.54                                 | <0.001 <sup>a</sup> |
| Education group             |                           |                          |                                          | <0.001 <sup>c</sup> |
| Unknown                     | 23137(7.6)                | 21805(7.4)               | 1332(13.6)                               |                     |
| High school or less         | 143443(47.4)              | 139752(47.7)             | 3691(37.8)                               |                     |
| Some College or more        | 135877(44.9)              | 131135(44.8)             | 4742(48.6)                               |                     |
| Dialysis vintage (mos)      |                           |                          |                                          | <0.001 <sup>c</sup> |

| <b>Factor</b>                                 | <b>Overall (n=302457)</b> | <b>Others (n=292692)</b> | <b>Four VA centers+ matched (n=9765)</b> | <b>p-value</b>      |
|-----------------------------------------------|---------------------------|--------------------------|------------------------------------------|---------------------|
| Not started                                   | 93521(30.9)               | 90556(30.9)              | 2965(30.4)                               |                     |
| 0-12                                          | 97896(32.4)               | 95027(32.5)              | 2869(29.4)                               |                     |
| >12-24                                        | 54476(18.0)               | 52507(17.9)              | 1969(20.2)                               |                     |
| >24-36                                        | 23295(7.7)                | 22395(7.7)               | 900(9.2)                                 |                     |
| >36                                           | 11%                       | 11%                      | 19%                                      |                     |
| BMI group                                     |                           |                          |                                          | <0.001 <sup>c</sup> |
| Missing                                       | 3531(1.2)                 | 3478(1.2)                | 53(0.54)                                 |                     |
| <25                                           | 27.10%                    | 27.30%                   | 23.80%                                   |                     |
| >25-30                                        | 99753(33.0)               | 96489(33.0)              | 3264(33.4)                               |                     |
| >30-35                                        | 73826(24.4)               | 71185(24.3)              | 2641(27.0)                               |                     |
| >35-50                                        | 43327(14.3)               | 41842(14.3)              | 1485(15.2)                               |                     |
| Inactive                                      | 81073(26.8)               | 80125(27.4)              | 948(9.7)                                 | <0.001 <sup>c</sup> |
| Listing era                                   |                           |                          |                                          | <0.001 <sup>c</sup> |
| 2004-2007                                     | 85347(28.2)               | 83173(28.4)              | 2174(22.3)                               |                     |
| 2008-2011                                     | 97578(32.3)               | 94271(32.2)              | 3307(33.9)                               |                     |
| 2012-2016                                     | 119532(39.5)              | 115248(39.4)             | 4284(43.9)                               |                     |
| Panel Reactive antibody >0%                   | 16.40%                    | 16.40%                   | 14.30%                                   | <0.001 <sup>c</sup> |
| Median distance to transplant center in miles | 22.4[8.9,65.8]            | 21.5[8.7,62.9]           | 81.6[23.9,210.2]                         | <0.001 <sup>b</sup> |
| Insurance                                     |                           |                          |                                          | <0.001 <sup>c</sup> |
| . VA                                          | 3663(1.2)                 | 758(0.26)                | 2905(29.7)                               |                     |
| . Private                                     | 141523(46.8)              | 137772(47.1)             | 3751(38.4)                               |                     |
| . Medicaid/CHIP                               | 25245(8.3)                | 25245(8.6)               | 0(0.0)                                   |                     |

| <b>Factor</b>                      | <b>Overall (n=302457)</b> | <b>Others (n=292692)</b> | <b>Four VA centers+ matched (n=9765)</b> | <b>p-value</b>      |
|------------------------------------|---------------------------|--------------------------|------------------------------------------|---------------------|
| . Medicare                         | 132026(43.7)              | 128917(44.0)             | 3109(31.8)                               |                     |
| Transplanted in a different center | 16647(11.8)               | 16213(11.9)              | 434(9.0)                                 | <0.001 <sup>c</sup> |
| MultiListing                       | 16321(5.4)                | 15853(5.4)               | 468(4.8)                                 | 0.007 <sup>c</sup>  |
| Accept an HCV Positive donor?      | 9402(3.1)                 | 8890(3.0)                | 512(5.2)                                 | <0.001 <sup>c</sup> |
| Risk Score                         | 19.9±10.2                 | 19.8±10.2                | 23.6±9.7                                 | <0.001 <sup>a</sup> |
| Rank for Variable Risk_Score       |                           |                          |                                          | <0.001 <sup>c</sup> |
| Q1                                 | 60280(19.9)               | 59211(20.2)              | 1069(10.9)                               |                     |
| Q2                                 | 58321(19.3)               | 56907(19.4)              | 1414(14.5)                               |                     |
| Q3                                 | 56046(18.5)               | 55201(18.9)              | 845(8.7)                                 |                     |
| Q4                                 | 64892(21.5)               | 61402(21.0)              | 3490(35.7)                               |                     |
| Q5                                 | 57870(19.1)               | 55080(18.8)              | 2790(28.6)                               |                     |
| Missing                            | 5048(1.7)                 | 4891(1.7)                | 157(1.6)                                 |                     |

**Supplementary Table 5: Adjusted analysis of transplantation in VA patients compared to other insurance groups at four local non-VA centers in a competing risks model with death as a competing risk.**

|                        | <b>All Transplants<br/>SHR (95% CI)</b> | <b>Deceased Donor<br/>Transplant<br/>SHR (95% CI)</b> | <b>Living Donor<br/>Transplant<br/>SHR (95% CI)</b> |
|------------------------|-----------------------------------------|-------------------------------------------------------|-----------------------------------------------------|
| <b>VA vs. Private</b>  | <b>0.73 (0.66, 0.80)</b>                | <b>0.83 (0.74, 0.93)</b>                              | <b>0.51 (0.42, 0.61)</b>                            |
| <b>VA vs. Medicare</b> | 1.00 (0.90, 1.11)                       | 1.07 (0.95, 1.21)                                     | 0.83 (0.68, 1.02)                                   |

Models adjusted for age group, race, gender, diagnosis group, time on dialysis at listing, candidate status at listing, PRA, BMI group, education, malignancy, peripheral vascular disease, region, year of listing, log distance to center and community risk score

Model of deceased donor transplant excludes live donor transplants. Model of living donor transplant excludes deceased donor transplants.



**Supplementary Table 6a: Adjusted Cox analysis of transplantation, mortality and delisting in VA patients compared to other insurance groups at four local non-VA centers excluding those with missing education.**

|                        | All Transplants          | Deceased Donor Transplant | Living Donor Transplant  | Death                    | Delisting*               |
|------------------------|--------------------------|---------------------------|--------------------------|--------------------------|--------------------------|
| <b>VA vs. Private</b>  | <b>0.74 (0.66, 0.83)</b> | <b>0.81 (0.71, 0.93)</b>  | <b>0.49 (0.39, 0.62)</b> | 0.94 (0.74, 1.18)        | <b>1.38 (1.07, 1.76)</b> |
| <b>VA vs. Medicare</b> | 0.99 (0.87, 1.12)        | 1.03 (0.89, 1.19)         | 0.83 (0.64, 1.08)        | <b>0.74 (0.59, 0.91)</b> | 0.85 (0.68, 1.07)        |

**Supplementary Table 6b: Adjusted Cox analysis of transplantation, mortality and delisting in VA patients compared to private insurance group at four local non-VA centers censoring data on December 4, 2014.**

|                        | All Transplants          | Deceased Donor Transplant | Living Donor Transplant  | Death                    | Delisting*        |
|------------------------|--------------------------|---------------------------|--------------------------|--------------------------|-------------------|
| <b>VA vs. Private</b>  | <b>0.75 (0.68, 0.84)</b> | <b>0.86 (0.75, 0.97)</b>  | <b>0.53 (0.43, 0.65)</b> | 1.00 (0.81, 1.23)        | 1.22 (0.95, 1.55) |
| <b>VA vs. Medicare</b> | 0.96 (0.86, 1.08)        | 1.02 (0.89, 1.16)         | 0.82 (0.65, 1.02)        | <b>0.73 (0.60, 0.89)</b> | 0.86 (0.69, 1.08) |

Models adjusted for age group, race, gender, diagnosis group, time on dialysis at listing, candidate status at listing, PRA, BMI group, education, malignancy, peripheral vascular disease, region, year of listing, log distance to center and community risk score

Model of deceased donor transplant excludes live donor transplants. Model of living donor transplant excludes deceased donor transplants.

\*Delisting for reasons of “health deterioration” or “other”.

**Supplementary Table 7. Secondary insurance at the time of initial listing by primary insurance group.**

| <b>Secondary Insurance</b> | <b>Overall<br/>(N=302,457)</b> | <b>VA<br/>(N=3,663)</b> | <b>Private<br/>(N=141,523)</b> | <b>Medicare<br/>(N=132,026)</b> | <b>Medicaid<br/>(N=25,245)</b> |
|----------------------------|--------------------------------|-------------------------|--------------------------------|---------------------------------|--------------------------------|
| <b>None</b>                | 63.6%                          | 92.0%                   | 77.0%                          | 43.5%                           | 89.2%                          |
| <b>Medicaid</b>            | 13.0%                          | 0.55%                   | 1.2%                           | 28.4%                           | 0.03%                          |
| <b>Private</b>             | 12.4%                          | 1.4%                    | 3.6%                           | 24.1%                           | 1.6%                           |
| <b>Medicare</b>            | 8.3%                           | 4.5%                    | 16.0%                          | 0.52%                           | 6.0%                           |
| <b>Other</b>               | 2.8%                           | 1.5%                    | 2.2%                           | 3.5%                            | 3.3%                           |
