# Supplementary material
Source: PubMed Central journal article supplement (PMC6171284)
Supplement: ASN.2017111204SupplementaryData2.pdf [file ASN.2017111204SupplementaryData2.pdf]

## **SIGNIFICANCE STATEMENT**

Previous analyses of kidney transplantation in Veterans Administration (VA) patients showed a reduction in access to kidney transplantation, including a reduced rate of listing for transplant. This study sought to examine relative transplant rates in VA patients from a more recent era who were successfully listed under VA insurance. Listed VA patients appeared to have delayed access to transplantation compared to non-VA patients with alternate insurance coverage nationally and at four competing non-VA centers. These findings warrant discussion and development of strategies to mitigate existing barriers to transplantation within the VA system.
